# Supplementary material for: A phosphoswitch at acinus-serine437 controls autophagic responses to cadmium exposure and neurodegenerative stress
Source: eLife. 2022 Jan 17;11:e72169. doi: 10.7554/eLife.72169 (PMC8794470; doi:10.7554/eLife.72169)
Supplement: Figure 1—source data 1. [file elife-72169-fig1-data1.xlsx]

## Sheet: Methods
Phosphatase RNAi lines were crossed to Da-Gal4 in order to measure knockdown of Phosphatases which are hits in the screen
Larvae were homogenized in Trizol reagent and total RNA was extracted according to manufacturers suggested protocol
TRiP lines and primer pair designs are listed in the manuscript
After RNA extraction nanodrop was used to check [c] and purity:
Tube #	Sample	[c] ng/uL	260/280	260/230	uL for 2ug RNA	ul for 10uL H2O
1	Da>PpD6	1312.9	2.11	2.04	1.52335	8.47665
2	Da>flw	920.7	2.11	2.17	2.17226	7.82774
3	Da>Pp1-13C	1262.6	2.12	2.15	1.58403	8.41597
4	Da>Ppv	1268.2	2.12	2.06	1.57704	8.42296
5	Da>CG15035	1142.5	2.11	1.92	1.75055	8.24945
6	Da>CG6036	1247.6	2.1	1.86	1.60308	8.39692
7	Da-Gal4 ctr	744.8	2.09	2.16	4.02793	10.9721	<-- Needed to make 3ug cDNA in 30uL for the control sample
cDNA was made using a high capacity cDNA reverse transcriptase kit from AB
	Component	Amt (uL)	for MM	MM		Thermal cycler program
	10X buffer	2	X10	20uL		25C for 10'
	10 random primers	2	X10	20uL		37C for 2hr
	dNTPs	0.8	X10	8uL		80C for 30s
	RT enzyme	1	X10	10uL		10C forever
	H2O	4.2	X10	42uL
	RNA (2ug)	10uL
cDNA was diluted 5X = 7uL cDNA + 28uL H2O for each of the RNAi lines. For the control cDNA, 25uL cDNA + 100uL H20 was required.
Primers were diluted 15uL fwd + 15uL rev + 70uL H2O.
Load 5uL of cDNA + 5uL primer MM. Then load 10uL Fast SYBR green Master Mix from AB.
Run the plate on AB Real Time PCR on Aug 24, 2017

## Sheet: Plate loading
	1	2	3	4	5	6	7	8	9	10	11	12
A	Da Ctr RP49			Da Ctr PpD6			Da Ctr flw			Da ctr Pp1-13C
B	Da Ctr Ppv			Da Ctr CG15035			Da Ctr CG6036
C	PpD6 RP49			PpD6 PpD6			flw RP49			Flw flw
D	Pp1-13C RP49			Pp1-13C Pp1-13C			Ppv RP49			Ppv ppv
E	CG15035 RP49			CG15035 cg15035			CG6036 RP49			CG6036 cg6036
F
G
H

## Sheet: Raw Data
Detector	Reporter	Start	End	Threshold
A	SYBR	(Auto)	(Auto)	Auto:0.3764
Well	SampleName	Start	End	Ct
1	DaCtr rp49	5	15	18
2	DaCtr rp49	5	10	17.3298
3	DaCtr rp49	3	8	17.3152
25	DaPpD6 rp49	5	12	18.5196
26	DaPpD6 rp49	5	12	18.3908
27	DaPpD6 rp49	5	12	18.3571
31	Daflw rp49	5	10	18.0462
32	Daflw rp49	5	11	18.0937
33	Daflw rp49	5	11	18.0292
37	DaPp1-13C rp49	5	12	18.3271
38	DaPp1-13C rp49	5	12	18.3119
39	DaPp1-13C rp49	5	11	18.183
43	DaPpv rp49	5	12	18.2083
44	DaPpv rp49	5	11	18.1631
45	DaPpv rp49	5	12	18.1678
49	DaCG15035 rp49	5	12	18.4223
50	DaCG15035 rp49	5	12	18.4151
51	DaCG15035 rp49	5	11	18.3428
55	DaCG6036 rp49	5	11	18.319
56	DaCG6036 rp49	5	12	18.3744
57	DaCG6036 rp49	5	12	18.3748
Detector	Reporter	Start	End	Threshold
B	SYBR	(Auto)	(Auto)	Auto:0.520506
Well	SampleName	Start	End	Ct
4	DaCtr Ppd6	5	17	24.7315
5	DaCtr Ppd6	5	17	24.5834
6	DaCtr Ppd6	5	17	24.6141
28	DaPpD6 ppd6	5	20	27
29	DaPpD6 ppd6	5	19	26.924
30	DaPpD6 ppd6	5	19	26.9805
Detector	Reporter	Start	End	Threshold
C	SYBR	(Auto)	(Auto)	Auto:0.364706
Well	SampleName	Start	End	Ct
7	DaCtr flw	3	8	19.2746
8	DaCtr flw	5	12	19.4474
9	DaCtr flw	5	15	20
34	Daflw flw	5	16	23.6071
35	Daflw flw	5	17	23.4482
36	Daflw flw	5	17	23.4726
Detector	Reporter	Start	End	Threshold
D	SYBR	(Auto)	(Auto)	Auto:0.457116
Well	SampleName	Start	End	Ct
10	DaCtr Pp1-13C	5	18	28.847
11	DaCtr Pp1-13C	5	20	28.8365
12	DaCtr Pp1-13C	5	21	28.6009
40	DaPp1-13C pp1-13c	5	24	31
41	DaPp1-13C pp1-13c	5	24	30.572
42	DaPp1-13C pp1-13c	5	24	30.7326
Detector	Reporter	Start	End	Threshold
E	SYBR	(Auto)	(Auto)	Auto:0.411083
Well	SampleName	Start	End	Ct
13	DaCtr Ppv	5	12	19.936
14	DaCtr Ppv	5	13	20
15	DaCtr Ppv	5	13	19.9218
46	DaPpv ppv	5	14	20.6478
47	DaPpv ppv	5	14	20.7074
48	DaPpv ppv	5	14	20.566
Detector	Reporter	Start	End	Threshold
F	SYBR	(Auto)	(Auto)	Auto:0.56617
Well	SampleName	Start	End	Ct
16	DaCtr CG15035	5	15	23.8142
17	DaCtr CG15035	5	15	23.7381
18	DaCtr CG15035	5	16	23.7054
52	DaCG15035 cg15035	5	21	28.9927
53	DaCG15035 cg15035	5	21	29
54	DaCG15035 cg15035	5	20	28.8316
Detector	Reporter	Start	End	Threshold
G	SYBR	(Auto)	(Auto)	Auto:0.38327
Well	SampleName	Start	End	Ct
19	DaCtr CG6036	5	15	22.6595
20	DaCtr CG6036	5	15	22.8565
21	DaCtr CG6036	5	15	22.7902
58	DaCG6036 cg6036	5	21	27
59	DaCG6036 cg6036	5	21	26.8406
60	DaCG6036 cg6036	5	20	26.8606

## Sheet: Analysis
																			Fold Increase
	SampleName	Ct		SampleName	Ct		ΔCt		SampleName	Ct		SampleName	Ct		ΔCt		ΔΔCt	Fold Increase	Avg	Knockdown %	StDev	Name
	DaCtr rp49	17.3225		DaCtr Ppd6	24.7315		7.409		DaPpD6 rp49	18.5196		DaPpD6 ppd6	27		8.4804		1.0714	0.475857
	DaCtr rp49	17.3298		DaCtr Ppd6	24.5834		7.2536		DaPpD6 rp49	18.3908		DaPpD6 ppd6	26.924		8.5332		1.2796	0.41191	0.429018	-0.570982	0.0410517	PpD6
	DaCtr rp49	17.3152		DaCtr Ppd6	24.6141		7.2989		DaPpD6 rp49	18.3571		DaPpD6 ppd6	26.9805		8.6234		1.3245	0.399288
	DaCtr rp49	17.3225		DaCtr flw	19.2746		1.9521		Daflw rp49	18.0462		Daflw flw	23.6071		5.5609		3.6088	0.0819677
	DaCtr rp49	17.3298		DaCtr flw	19.4474		2.1176		Daflw rp49	18.0937		Daflw flw	23.4482		5.3545		3.2369	0.106071	0.111935	-0.888065	0.0332895	flw
	DaCtr rp49	17.3152		DaCtr flw	20		2.6848		Daflw rp49	18.0292		Daflw flw	23.4726		5.4434		2.7586	0.147767
	DaCtr rp49	17.3225		DaCtr Pp1-13C	28.847		11.5245		DaPp1-13C rp49	18.3271		DaPp1-13C pp1-13c	30.6523		12.3252		0.8007	0.574071
	DaCtr rp49	17.3298		DaCtr Pp1-13C	28.8365		11.5067		DaPp1-13C rp49	18.3119		DaPp1-13C pp1-13c	30.572		12.2601		0.7534	0.593204	0.541671	-0.458329	0.0733137	Pp1-13C
	DaCtr rp49	17.3152		DaCtr Pp1-13C	28.6009		11.2857		DaPp1-13C rp49	18.3195		DaPp1-13C pp1-13c	30.7326		12.4131		1.1274	0.45774
	DaCtr rp49	17.3225		DaCtr Ppv	19.936		2.6135		DaPpv rp49	18.2083		DaPpv ppv	20.6478		2.4395		-0.174	1.12818
	DaCtr rp49	17.3298		DaCtr Ppv	20		2.6702		DaPpv rp49	18.1631		DaPpv ppv	20.7074		2.5443		-0.1259	1.09119	1.12493	0.124925	0.0322326	Ppv
	DaCtr rp49	17.3152		DaCtr Ppv	19.9218		2.6066		DaPpv rp49	18.1678		DaPpv ppv	20.566		2.3982		-0.2084	1.15541
	DaCtr rp49	17.3225		DaCtr CG15035	23.8142		6.4917		DaCG15035 rp49	18.4223		DaCG15035 cg15035	28.9927		10.5704		4.0787	0.0591819
	DaCtr rp49	17.3298		DaCtr CG15035	23.7381		6.4083		DaCG15035 rp49	18.4151		DaCG15035 cg15035	29		10.5849		4.1766	0.0552991	0.0576174	-0.942383	0.00204821	CG15035
	DaCtr rp49	17.3152		DaCtr CG15035	23.7054		6.3902		DaCG15035 rp49	18.3428		DaCG15035 cg15035	28.8316		10.4888		4.0986	0.0583712
	DaCtr rp49	17.3225		DaCtr CG6036	22.6595		5.337		DaCG6036 rp49	18.319		DaCG6036 cg6036	27		8.681		3.1543	0.112321
	DaCtr rp49	17.3298		DaCtr CG6036	22.8565		5.5267		DaCG6036 rp49	18.3744		DaCG6036 cg6036	26.8406		8.4662		3.1292	0.114292	0.116894	-0.883106	0.00629061	CG6036
	DaCtr rp49	17.3152		DaCtr CG6036	22.7902		5.475		DaCG6036 rp49	18.3748		DaCG6036 cg6036	26.8606		8.4858		3.0108	0.124068
